# Supplementary material
Source: MDPI journal article supplement (https://www.mdpi.com/2073-4433/13/2/213)
Supplement: s1 [file s1]

# Supplementary Materials: Black Carbon in Bulgaria—Observed and Modelled Concentrations in Two Cities for Two Months

Elena Hristova <sup>1,\*</sup>, Emilia Georgieva <sup>1</sup>, Blagorodka Veleva <sup>1</sup>, Nadya Neykova <sup>1</sup>, Stela Naydenova <sup>2</sup>, Lenia Gonsalvesh-Musakova <sup>3</sup>, Rozeta Neykova <sup>1</sup> and Anton Petrov <sup>1</sup>

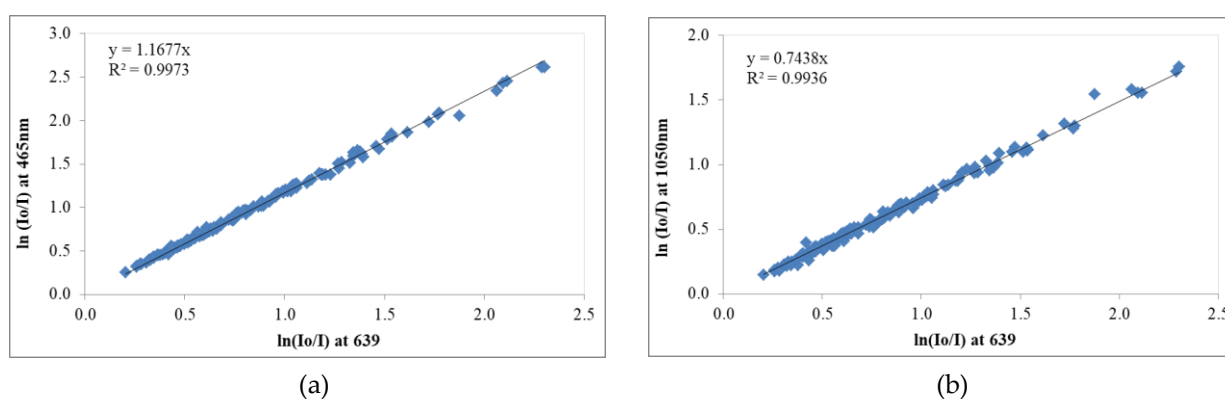

**Figure S1.** Example of log plot of wavelength data against log of all  $\lambda=639\text{nm}$  data.

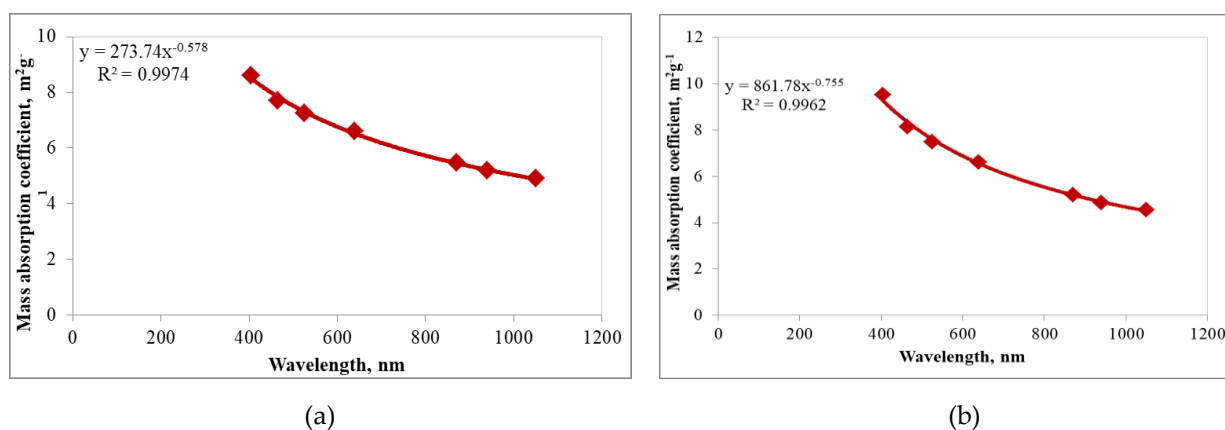

**Figure S2.** Mass Absorption Coefficients vs wavelength (a) Sofia and (b) Burgas.
